# Supplementary material
Source: publisher figshare collection journal article supplement (https://springernature.figshare.com/ndownloader/files/23740614)
Supplement: Supplementary file 1 [file 23740614]

**S-table. Underlying conditions of IPA patients**

| <b>Underlying conditions</b>              | All patients<br>n=254 | Proven<br>n=51 | Others<br>n=203 |
|-------------------------------------------|-----------------------|----------------|-----------------|
| <i>immunocompromised host factors</i>     | 66 (26.0%)            | 11 (21.6%)     | 55 (27.1%)      |
| use of corticosteroid                     | 46 (18.1%)            | 7 (13.7%)      | 39 (19.2%)      |
| use of immunosuppressive agent            | 31 (12.2%)            | 4 (7.8%)       | 27 (13.3%)      |
| chemotherapy                              | 12 (4.7%)             | 3 (5.9%)       | 9 (4.4%)        |
| solid organ transplantation               | 5 (2.0%)              | 3 (5.9%)       | 2 (1.0%)        |
| neutropenia                               | 7 (2.8%)              | 2 (3.9%)       | 5 (2.5%)        |
| <i>Non-immunocompromised host factors</i> | 188 (74.0%)           | 40 (78.4%)     | 148 (72.9%)     |
| COPD                                      | 57 (22.4%)            | 3 (5.9%)       | 54 (26.6%)      |
| diabetes                                  | 45 (17.7%)            | 15 (29.4%)     | 30 (14.8%)      |
| viral pre-infection                       | 18 (7.1%)             | 2 (3.9%)       | 16 (7.9%)       |
| liver dysfunction                         | 17 (6.7%)             | 6 (11.8%)      | 11 (5.4%)       |
| bronchiectasis                            | 6 (2.4%)              | 2 (3.9%)       | 4 (2.0%)        |
| asthma                                    | 11 (4.3%)             | 3 (5.9%)       | 8 (4.0%)        |
| renal insufficiency                       | 9 (3.5%)              | 1 (2.0%)       | 8 (4.0%)        |
| Without underlying diseases               | 36 (14.3%)            | 8 (15.7%)      | 24 (11.8%)      |

COPD: chronic obstructive pulmonary disease

EORTC/MSG: European Organization for Research and Treatment of Cancer/Invasive Fungal Infections Cooperative Group and the National Institute of Allergy and Infectious Diseases Mycoses Study Group

**S-Figure. Radiological presentations of IPA patients**

- A. cavity (grey arrow) and air crescent sign (black arrow)
- B. Halo sign (grey arrow)
- C. air crescent sign (grey arrow)
- D. wedge shaped consolidation (black arrow)
- E. patches distributing along the airway of right lower lobe bronchus (grey arrow)
- F. tree in bud sign (grey arrow)
- G. centrilobular nodules (black arrow)
- H. atelectasis (grey arrow) and airway wall thickness (black arrow)
